# Supplementary material for: Transverse magnetoconductance in two-terminal chiral spin-selective devices
Source: Royal Society of Chemistry journal article supplement (doi:10.1039/d2nh00502f), 2023-01-01
Supplement: d2nh00502f1.pdf [file d2nh00502f1.pdf]

## Supporting Information

### Transverse Magnetoconductance in Two-Terminal Chiral Spin-Selective Devices

Md Anik Hossain,<sup>a</sup> Sara Illescas-Lopez,<sup>b</sup> Rahul Nair,<sup>a,c</sup> Juan Manuel Cuerva,<sup>b</sup> Luis Álvarez de Cienfuegos,<sup>b,d</sup> Sandipan Pramanik<sup>a,\*</sup>

<sup>a</sup> Department of Electrical and Computer Engineering, University of Alberta, Alberta T6G 1H9, Canada

<sup>b</sup> Universidad de Granada, Departamento de Química Orgánica, Unidad de Excelencia Química Aplicada a Biomedicina y Medioambiente, C. U. Fuentenueva, Avda. Severo Ochoa s/n, E-18071 Granada, Spain

<sup>c</sup> School of Electronics Engineering, Vellore Institute of Technology, Chennai 600127, India

<sup>d</sup> Instituto de Investigación Biosanitaria ibs. Avda. De Madrid, 15, E-18016 Granada, Spain

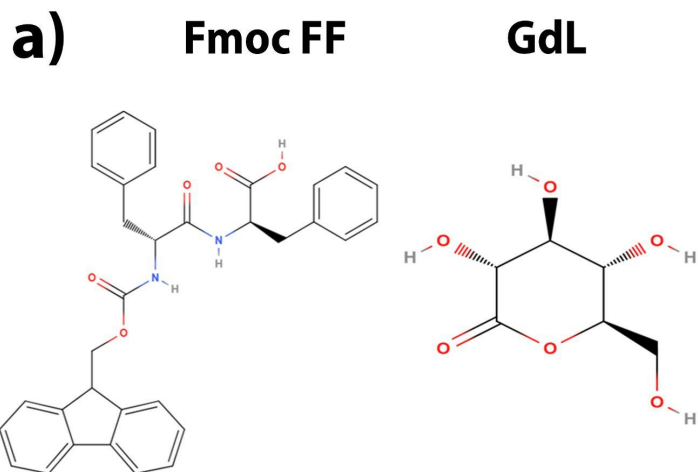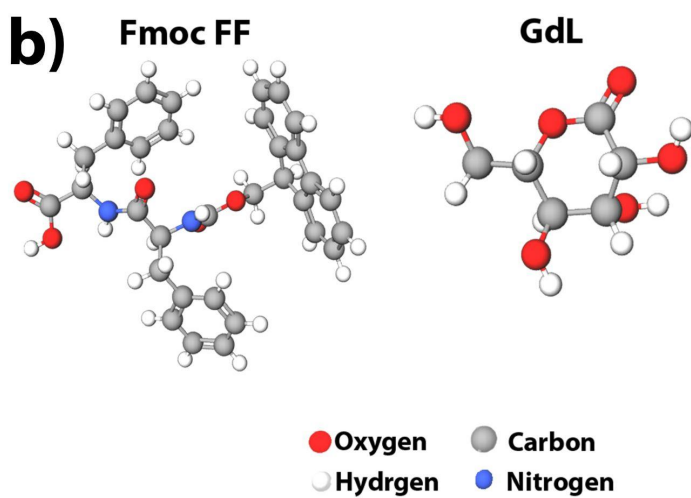

**Figure S1.** Molecular structures of Fmoc-FF (representing the D stereoisomer) and GdL

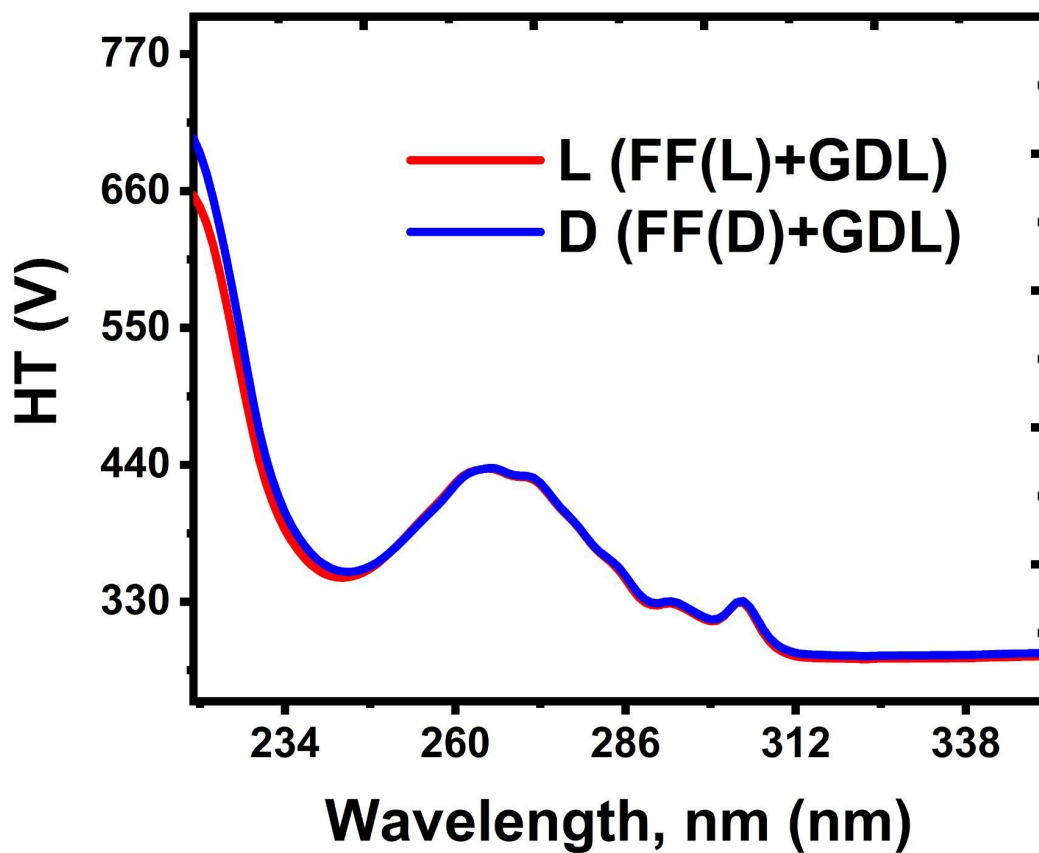

**Figure S2.** HT spectra of Fmoc-FF (L/D) hydrogels formed in presence of GdL
